# Supplementary material
Source: PubMed Central journal article supplement (PMC7931140)
Supplement: jamapsychiatry-e204768-s002.pdf [file jamapsychiatry-e204768-s002.pdf]

Supplemental Online Content: Nonauthor Collaborators

\*Indicates required information. Only first name, last name, and suffix will appear in PubMed.

| <b>Group Name(s):*</b> The HONOR Study Team |            |                       |                  |                               |                                          |                                                         |                                                                                            |
|---------------------------------------------|------------|-----------------------|------------------|-------------------------------|------------------------------------------|---------------------------------------------------------|--------------------------------------------------------------------------------------------|
| First Name and Middle Initial(s)*           | Last Name* | Suffix (eg, Jr, III)* | Academic Degrees | Institution                   | Location (city, state/province, country) | Role or Contribution, eg, chair, principal investigator | Group (if more than 1 Group listed in the byline) and/or Subgroup (eg, Steering Committee) |
| Brianna                                     | Lengele    |                       |                  | Southcentral Foundation       | Anchorage, AK, US                        | Research Assistant                                      |                                                                                            |
| Abigail                                     | Echo-Hawk  |                       | MA               | Urban Indian Health Institute | Seattle, WA, US                          | Tribal Liaison                                          |                                                                                            |
| Emily                                       | Leickly    |                       | MS               | Portland State University     | Portlans, OR, US                         | Research Coordinator                                    |                                                                                            |
| Jenny                                       | Nepom      |                       | BSN              |                               | Seattle, WA, US                          | Research Coordinator                                    |                                                                                            |
| Tyler                                       | Rus        |                       |                  | Southcentral Foundation       | Anchorage, AK, US                        | Research Assistant                                      |                                                                                            |
| Devon                                       | Sigourney  |                       |                  | Southcentral Foundation       | Anchorage, AK, US                        | Research Assistant                                      |                                                                                            |
| Jordan                                      | Skalisky   |                       | MS               | Seattle Pacific University    | Seattle, WA, US                          | Research Coordinator                                    |                                                                                            |
