# Supplementary material
Source: PubMed Central journal article supplement (PMC7931140)
Supplement: jamapsychiatry-e204768-s003.pdf [file jamapsychiatry-e204768-s003.pdf]

## Data Sharing Statement

McDonnell. Effect of Incentives for Alcohol Abstinence in Partnership With 3 American Indian and Alaska Native Communities. *JAMA Psychiatry*. Published March 03, 2021.  
doi:10.1001/jamapsychiatry.2020.4768

### Data

**Data available:** No

### Additional Information

**Explanation for why data not available:** We are unable to share data because of our legally binding data sharing agreements with our Tribal partners specifying that only individuals who are part of the study team are allowed to have access to data collected in the study and that all data gathered in this study are owned by our Tribal partners.
